# Supplementary material
Source: PubMed Central journal article supplement (PMC3108606)
Supplement: supp_msq267_SM-Yokoyama.pdf [file supp_msq267_SM-Yokoyama.pdf]

## Supplementary material for

### Molecular convergence of infrared vision in snakes

Shozo Yokoyama<sup>1</sup> Ahmet Altun<sup>1,2</sup> and Dale F. DeNardo<sup>3</sup>

<sup>1</sup> Department of Biology, Emory University

<sup>2</sup> Cherry L. Emerson Center for Scientific Computation and Department of Chemistry, Emory University

<sup>3</sup> School of Life Sciences, Arizona State University

## Materials and Methods

### Statistical analyses of DNA and amino acid sequences

To establish the phylogenetic relationship of the TRPA1 proteins of not only the infrared-sensitive boa (*Corallus hortulanus*), python (*Python regius*), and pit viper (*Crotalus atrox*) but also infrared-nonsensitive rat snake (*Elaphe obsoleta lindheimeri*), we aligned the nucleotide sequences of TRPA1 genes of rattlesnake (GenBank accession number: GU562967), python (GU562965), boa (GU562969), rat snake (GU562966), zebrafish a (NM\_001007065), zebrafish b (NM\_001007066), frog (NM\_001127962), zebra finch (XM\_002197822), chicken (XM\_418294), human (NM\_007332), macaque (XM\_001083172), mouse (AY231177), rat (NM\_207608 XM\_232586), dog (XM\_544123), XM\_001493464 (XM\_001493464), pig (XM\_001926115), cow (XM\_581588), and opossum (XM\_001378390).

The alignment of these sequences was done first by applying Clustal W to the amino acid sequences deduced from these genes and then adjusted visually. Then, we applied the NJ method (Saitou and Nei 1987) to the p distances for a total of 929 common codons (positions 62-88, 91-609, 612-622, 626-685, 687-746, 756-823, and 825-1010; numbering follows the western diamondback rattlesnake sequence) and orthologous mosquito (EU624401) and fruit fly (NM\_140006) sequences, and constructed a rooted phylogenetic tree of vertebrate TRPA1 genes (and TRPA1 proteins). To infer the amino acid sequences at all ancestral nodes in Fig. 1A, the codeml of PAML (Yang 2007) was applied to the corresponding amino acid sequences. In the PAML analyses, Dayhoff, Wagner, and JTT models were used.

## Molecular structure of ankyrin repeats

To study the effect of three amino acid changes (L330M, Q391H, and S434T) on the structure of the 17 ankyrin repeats of TRPA1 proteins that are located at the amino acid sites 68-655 (fig. S2), we evaluated their structures of the ancestral snake TRPA1 with and without the three mutations.

The initial coordinates of the ancestral TRPA1 were obtained by applying homology modeling (CPH models 3.0 server, [www.cbs.dtu.dk/services/CPHmodels](http://www.cbs.dtu.dk/services/CPHmodels)) to human ankyrin repeat (pdb code: 1N11). Since the number of amino acids between the ancestral TRPA1 (588) and the human orthologue (404 resolved out of 437) differ, we considered the three overlapping ankyrin segments of TRPA1 separately: 1) the segment without the first and last 70 amino acids (M1), 2) the first 150 amino acids (M2), and 3) the last 150 amino acids (M3). Then, the last/first 80 amino acids of M2/M3 structure were superimposed with the corresponding amino acids in the M1 structure. Good agreement was observed for the overlapped parts, indicating a high quality for the structures. Then, M1-3 structures were combined by deleting the coordinates of the common amino acids in M1 with M2 and M3.

Based on PROPKA (<http://propka.ki.ku.dk/>) pKa calculations and visual inspection, we applied standard protonation states for all amino acids of the resulting structure except histidines: 12 histidines at the protein surface were doubly protonated while the remaining 18 histidines were singly protonated at either  $\delta$  or  $\epsilon$  nitrogen depending on their local environment. Standard N and C terminals were used for L68 and K655. The net charge of the resulting model is zero.

After protonating the modeled TRPA1, a series of geometry optimizations were performed with AMBER96 (<http://ambermd.org>) force field. First, only hydrogens were relaxed. Next, only  $C_{\alpha}$  atoms were fixed while the rest was relaxed. Then, all coordinates were fully relaxed to obtain final structure of the ancestral TRPA1.

Three mutations (L330M/Q392H/S435T) were then introduced into the ancestral TRPA1 structure by first relaxing only the coordinates of the mutated residues and then all coordinates of the mutant TRPA1.

|             |  |                                                                                                       |     |     |       |     |     |
|-------------|--|-------------------------------------------------------------------------------------------------------|-----|-----|-------|-----|-----|
|             |  | 10                                                                                                    | 20  | 30  | 40    | 50  | 60  |
| Rattlesnake |  | MQR <u>S</u> ILKLFQSRVQKQOSVD--SSDGVVSEGDACSVASQDIFKVVSDGNTSRLRSLIKKNRR                               |     |     |       |     |     |
| Rat snake   |  | MKRSILKWFQSRDQKQH---PSSYEGVVCEADACSVASQDVFKVISDGGSTCRLRSFIKKNRE                                       |     |     |       |     |     |
| Python      |  | MMRSILKWFQSHVQKQEQDALSIEYEGVVCEPDACSVASQDVFKVISGGSTSRLSRFIKKNRN                                       |     |     |       |     |     |
| Boa         |  | MKRWILKWFQSHGQK---EQDIYYDGVVCEPDACSVASQDIFKVMSDGNTSRLRSFIKKNRSK                                       |     |     |       |     |     |
|             |  | ANK 1                                                                                                 |     |     |       |     |     |
|             |  | 70                                                                                                    | 80  | 90  | 100   | 110 | 120 |
| ancestor    |  | <u>LKKLDEL</u> NATPLHHAAGNGQLELMQMIMDDSSPEALNVADSSGNTPLHWATKKHQIESV                                   |     |     |       |     |     |
| Rattlesnake |  | RLKKLDRLNATPLHHAAGNGQLELMQMIMDGSSPEALNVADVSGNTPLHWATKKHQTESI                                          |     |     |       |     |     |
| Rat snake   |  | GLKKLDKLNATPLHHAAGKQLELMQMIMDDSSFEALNVTDSSGNTPLHWATKKQOTESV                                           |     |     |       |     |     |
| Python      |  | GLKKLDEMKAATPLHHAAGGGQLELMIMDGSSAEALNIGDAYGNTPLHWATKKHQIESV                                           |     |     |       |     |     |
| Boa         |  | GLKKLDDMNASPLHHAANGQLEFMQMIMDDSPPEALNVADNAGNTPLHWATKKQOIESV                                           |     |     |       |     |     |
|             |  | ANK 2                                                                                                 |     |     | ANK 3 |     |     |
|             |  | 130                                                                                                   | 140 | 150 | 160   | 170 | 180 |
| ancestor    |  | KLLLSRGANPNILNSNMMAPLHWAVQYLFNDLVKIFLENSITD <sup>.</sup> VNLEGE <sup>.</sup> GGNTPILLACY              |     |     |       |     |     |
| Rattlesnake |  | KLLLSRGANPNILNVNMIAPLHWALHYLLDDLVTIFLECSNTNINLEGE <sup>.</sup> GGNTPILLACY                            |     |     |       |     |     |
| Rat snake   |  | KLLLSRGANPNILNSNMVSPLHWAVQYLCNDLVKIFLECSITD <sup>.</sup> VNLEGE <sup>.</sup> GGNTPILVACY              |     |     |       |     |     |
| Python      |  | KLLLSRGASPNLSLNKNMAMAPLHWAVQYFFD <sup>.</sup> LLKIFIENDMTEINLEGE <sup>.</sup> SGNTAILLACY             |     |     |       |     |     |
| Boa         |  | KLLLRKGANPNVANANMMTPFH <sup>.</sup> VVQYHFNDLVKIFLENSLTDVN <sup>.</sup> LGGE <sup>.</sup> GGNTPILLACY |     |     |       |     |     |
|             |  | ANK 4                                                                                                 |     |     | ANK 5 |     |     |
|             |  | 190                                                                                                   | 200 | 210 | 220   | 230 | 240 |
| ancestor    |  | KDNPEALKLLIEKGGDICKANNMGCMPVHAAAFSGSKLCMEIIIKRGEELGYSPESHINF                                          |     |     |       |     |     |
| Rattlesnake |  | KDNPTALKILIEKGGDICKVNNMGCMPVHAAAFSGSKLCLEMIIKRGEQLGYSPKNHINF                                          |     |     |       |     |     |
| Rat snake   |  | KDNSEALKLLIENG <sup>.</sup> GDIKANNMGCMPVHAAAFSGSKLCLEIIIKRGVELGYSPENHINF                             |     |     |       |     |     |
| Python      |  | KDNPEALKLLIERGADICKANHMGTMPIHAAAFSGSKICMEMVIKQAEKLGHSPESHINS                                          |     |     |       |     |     |
| Boa         |  | KDNPEALKLLIEKGGDICKANNTGCM <sup>.</sup> AVHAAATSGAKLCMEIVIRRGEDLGYTRESHINF                            |     |     |       |     |     |
|             |  | ANK 6                                                                                                 |     |     | ANK 7 |     |     |
|             |  | 250                                                                                                   | 260 | 270 | 280   | 290 | 300 |
| ancestor    |  | TNNGKSSPLHLAVQSRDLEMIMKICIEYGAQIDLKQNDNCTALHFAATQGATEILKLMMS                                          |     |     |       |     |     |
| Rattlesnake |  | INNEKSSPLHLAVQSRDVEIMKICIEYGAQIDLKQSDNCTALHIAAIQGATEIIELLSA                                           |     |     |       |     |     |
| Rat snake   |  | TNNGKCSPLHLAVQSRDLEMIMKICIEYGAQIDLKQNDNCTALHFAATQGATEILKLMMS                                          |     |     |       |     |     |
| Python      |  | LDNARNSPHLAVQSRDLEMIRKICIEYGAQVDLKQNDKCTALHFAATQGATEILKLMISS                                          |     |     |       |     |     |
| Boa         |  | TTTGKSSPLHLAVQSRDLEMIMKICIEYGAQIDLKQNDNCTALHFAATQGATDILKLMMS                                          |     |     |       |     |     |
|             |  | ANK 8 *                                                                                               |     |     |       |     |     |
|             |  | 310                                                                                                   | 320 | 330 | 340   | 350 | 360 |
| ancestor    |  | YTGEESIINAVDGNKETLLHRAALFDHHELAEYLI <sup>.</sup> SKGANIDSVDTEGRTPLLLATSCAS                            |     |     |       |     |     |
| Rattlesnake |  | YSGEECLINASDENKETLLHRAALFDHDEMTDYLI <sup>.</sup> SKGANIDSVDIEGRTPLILATSRAS                            |     |     |       |     |     |
| Rat snake   |  | YTGEESIINALDGNKETLLHRAALFDHHELAEYLI <sup>.</sup> SKGANINSVDIEGRTPLLLATSCAS                            |     |     |       |     |     |
| Python      |  | YTGEVSLINVVDGKKETLLHRAALFDHCEMAEYLI <sup>.</sup> SMGAHIDSVDTEGRTPLLLATSCGS                            |     |     |       |     |     |
| Boa         |  | YEGDESIVNAADGNKETMLHRAALFDHCEMAEYLI <sup>.</sup> SKGAKIDCVDHEGRTPLLLTACGS                             |     |     |       |     |     |

**Supplementary Figure 1:** The TRPA1 proteins of the rattlesnake, rat snake, python, boa, and their common ancestor. Amino acid sites that are conserved among the rattlesnake, python, and boa are shown by dots (.) and stars (\*). The dots indicate that amino acids are highly variable among the 18 orthologous receptors and/or not unique to the three snake proteins, whereas the stars indicate not only are amino acids unique to the three infrared-sensitive proteins but also all others are identical (see also Fig. 1). A partial sequence of the ancestral snake TRPA1 protein is also shown, where amino acids that have a posterior probability of < 0.95 are underlined. TM I-VI is indicated by black boxes.

|             | ANK 9                                       |          | *   | ANK 10                 |              |                   |
|-------------|---------------------------------------------|----------|-----|------------------------|--------------|-------------------|
|             | 370                                         | 380      | 390 | 400                    | 410          | 420               |
| ancestor    | WKIVNLLLSKGANVELKDHLGRNFLHLTVLQPGGLQHLNEEF  |          |     | FLKMKHIRD              | LDLVT        | EEDHEGC           |
| Rattlesnake | WKIVNLLLSKGANIQDKDHLGRSFLHLTVLHPGGGLQHLNEEF |          |     | FLKMKHIRD              | LLTDED       | HEGC              |
| Rat snake   | WKIVNLLLSKGANVELKDLLGHNFLHLTVLQPGGLQHLNED   |          |     | FLKMKHIRD              | LITEED       | QEGC              |
| Python      | WKLVNLLLSKGANLELKDHLGRNFLHLTVLHPGGGLQHLSE   |          |     | QFLKMKVIED             | LVGEED       | REGC              |
| Boa         | WKIVNLLLSKGANLELKDHLGRNVLHLAVLHPGGGLQRLNEE  |          |     | IILKLT                 | TCIRNL       | EEDHEGC           |
|             |                                             | * ANK 11 |     |                        | ANK 12       |                   |
|             | 430                                         | 440      | 450 | 460                    | 470          | 480               |
| ancestor    | TPLHYACKQGVPLSVNILLGMNVSVYAKSRDKKSPLHFAASY  |          |     | GRINTCHR               | LLEAM        | KDTRL             |
| Rattlesnake | TPLHYACKQGMPLTVNILLGMNVSVYAKSRDKKSPLHFAAS   |          |     | HGRNLNT                | CLRLLES      | MDDTRL            |
| Rat snake   | TPLHYASKQGVPLSVNILLEMNVS                    |          |     | YAKSRDKKSPLHFAASY      | GRINTCL      | RLLLEAMEDTRL      |
| Python      | TPLHYACKQGVPLTVNILLKMNVS                    |          |     | YAKSREKKSPLHYAASY      | GRIHTCHR     | LLESMPDTRL        |
| Boa         | TPLHYASRQGVPLTINTLLSMNVSVYCKSRDKKSPLHFAAS   |          |     | NGRLNT                 | CCLLLEAM     | KDTRL             |
|             |                                             | ANK 13   |     |                        | ANK 14       |                   |
|             | 490                                         | 500      | 510 | 520                    | 530          | 540               |
| ancestor    | LNEDGKKGMTPLHLAAQNGHEKVVQFLLKKGALFLCDYK     |          |     | GWTA                   | LHHA         | AFGGYTRTMQIIL     |
| Rattlesnake | LNEDGRKGMTPLHLAAQYGHEKVTQLLLKKGALFN         |          |     | SDYKGW                 | TPLHHA       | ALGGYSRTMEIIL     |
| Rat snake   | LNEDGKKGMTPLHLAAQNGHEKVVQFLLKKGALFLCDY      |          |     | KGWTA                  | LHHA         | AFGGYTRTMQIIL     |
| Python      | LNEDGKKGLTPLHLASQNGHEKVVQFLLKRGALFG         |          |     | CNDK                   | GWTA         | LHHA              |
| Boa         | LNEDGKKGMTPLHLAAENGHEKIAQFLLKKGALFLS        |          |     | DNK                    | GWTA         | LHHA              |
|             |                                             | ANK 15   |     |                        |              |                   |
|             | 550                                         | 560      | 570 | 580                    | 590          | 600               |
| ancestor    | NTNMKATDKVDEEGNTALHLAAREGHAKAVKLL           |          |     | DDNAKILL               | NKAEAS       | FLHEAIHNGR        |
| Rattlesnake | NTNMKSTDKVNDKGD                             |          |     | TALHLAAREGHARAVKLL     | LDANAKILL    | NESEASFLHEAIHNERK |
| Rat snake   | NTNMKATDKVNDKGD                             |          |     | TALHLAAREGHAKAVKLL     | DDNAKILL     | NSAEASFLHEAIHNGR  |
| Python      | NTNMIATDKEDKEDGNTGLHLAAREGHAKAVKLL          |          |     | DGNAKIVLN              | KAEASFLHEAI  | RNGRKN            |
| Boa         | DTNVKATDNVDEGNTALHLAAREGHAKAVKLL            |          |     | DEGAKILL               | NKVEASFLHEAI | HNGQRD            |
|             |                                             | ANK 16   |     | ANK 17                 |              |                   |
|             | 610                                         | 620      | 630 | 640                    | 650          | 660               |
| ancestor    | VNVVILHKRWEESITTF                           |          |     | SHNSSINKCAILEMVEYLPDCL | KLVL         | DNCIIESPEEK       |
| Rattlesnake | VVKIVILHKRWEESISTF                          |          |     | SHFSSINKCAILEMVEYLPDCL | KLVL         | DNCIVKSPEDK       |
| Rat snake   | VVNAVILHKRWEESITTF                          |          |     | SHHSSINKCAILEMVEYLPDCL | KLVL         | DNCIIESPDEK       |
| Python      | VNVVILHKRWEESMTTF                           |          |     | SHNSSINKCAILEMVEYLPDCL | KLVL         | DNCIVRSPDEK       |
| Boa         | VVTVVILHKRWEEAISTF                          |          |     | SHQSSVNKCAILDMVEYLP    | GC           | KLVL              |
|             |                                             |          |     | DNCI                   | IR           | SPEEK             |
|             |                                             |          |     | SADF                   |              |                   |
|             | 670                                         | 680      | 690 | 700                    | 710          | 720               |
| ancestor    | FIENFRYLQCP                                 |          |     | KLK VKENEGV            | YEP          | LLALNAMVRHNR      |
| Rattlesnake | FVEYNFTYLQCP                                |          |     | LQFKKKVKENEGV          | VEYEP        | LLALNGMVRHNR      |
| Rat snake   | CIEYNFRYLQCP                                |          |     | LKLLKKFKENEGII         | VEYEP        | LLALNGMVRHNR      |
| Python      | SIQYNFRYLQCP                                |          |     | LTLLTKKSKAQDGV         | VEYEP        | LLALNAMVRYNR      |
| Boa         | FIENFRYLQCP                                 |          |     | LTKKSKGNGGAL           | VEYEP        | LLALNAMVLHNR      |
|             |                                             | TM I     |     |                        | TM II        |                   |
|             | 730                                         | 740      | 750 | 760                    | 770          | 780               |
| ancestor    | YGFRAHIMNLAVYSLGLIPL                        |          |     | TLLVTS                 | TLKHGPF      | DNKDSNF           |
| Rattlesnake | YGLRAHIMNLAVYSLGLIPL                        |          |     | TLLVTSLEPDIS           | FDEPLOYGPF   | DNKKS             |
| Rat snake   | YGFRAHIMNLAVYSLGLIPL                        |          |     | TLLVTHLEPDVCF          | NATLKYGPF    | DNKDSNF           |
| Python      | YGFRAHIMNLAVYSLGLIPL                        |          |     | TLLITSIEPEVS           | FNTTFKHGPF   | DKKDSNF           |
| Boa         | YGFRAHIMNLAVYSLGLIPL                        |          |     | TLLITSLEPKVTF          | NATLKHGPF    | DKKNSNF           |

Supplementary Figure 1 (continued)

|             |  |                                                               |      |        |      |       |      |  |  |  |
|-------------|--|---------------------------------------------------------------|------|--------|------|-------|------|--|--|--|
|             |  |                                                               |      | TM III |      |       |      |  |  |  |
|             |  | 790                                                           | 800  | 810    | 820  | 830   | 840  |  |  |  |
| ancestor    |  | SLFGICKEIIQLFQOKLNYLLDYSNLLDWTIYTTSIIFVSSLF KLPVHLOWDCGAIAIL  |      |        |      |       |      |  |  |  |
| Rattlesnake |  | SLFGICKEIIQLFQOKLNYLMDYSNLLDWAIYTTSIIFVSSLLVTLPVHLOWHCGAIAIL  |      |        |      |       |      |  |  |  |
| Rat snake   |  | SLFGICKEIIQLFQOKLNYLLDYSNLLDWTIYTTSIIFVSSLFVMLPIRLOWDCGAIAIL  |      |        |      |       |      |  |  |  |
| Python      |  | SLFGICKEFMQLFQOKLRYLLDYTNLLDWTIYTTSIIFVSSLFVKLPVHLOWECGAIAIL  |      |        |      |       |      |  |  |  |
| Boa         |  | SLFGICKEIIQLFQORLKYLLDYSNLLDWTIYTTSIIFVSSLFVKLPVHLOWDCGAIAIL  |      |        |      |       |      |  |  |  |
|             |  | TM IV                                                         |      | TM V   |      |       |      |  |  |  |
|             |  | 850                                                           | 860  | 870    | 880  | 890   | 900  |  |  |  |
| ancestor    |  | LSWTNFLLYLQRFENYGIYVVMFWEILRTLIRIVVVFFFLMLAFGLSFYVLLGSQOTYGT  |      |        |      |       |      |  |  |  |
| Rattlesnake |  | LAWTNFLFYLQRFENYGIYIVMFWEILKTLIRIIVVFFFLMLAFGLSFHVLGSOETYGT   |      |        |      |       |      |  |  |  |
| Rat snake   |  | LAWTNFLLYLQRFENYGIYIVMFWEILRTLIRIVIVVFFFLMLAFGLSFYVLLGSQOTYGT |      |        |      |       |      |  |  |  |
| Python      |  | LSWTNFLLYLQRFENYGIYVVMFWEILRTLIRIVVVFFFLMLAFGLSFHVLGSOQTYGT   |      |        |      |       |      |  |  |  |
| Boa         |  | LSWTNFLLYLQRFESYGIYVVMFWEILRTLIRIVTVVFFFLMLAFGLSFFVLLGSQOTYGT |      |        |      |       |      |  |  |  |
|             |  |                                                               |      |        |      | TM VI |      |  |  |  |
|             |  | 910                                                           | 920  | 930    | 940  | 950   | 960  |  |  |  |
| ancestor    |  | PYLSVMQTFSMMLGDVNYRDAFLEPMLANKLPFPFLSFIIILIIIFSLIPILLMNLIGLA  |      |        |      |       |      |  |  |  |
| Rattlesnake |  | PYLSVMQTFSMMLGDVNYREAFLEPMLVDKLPFPFLSFIIILILFSLIPILLMNLIGLA   |      |        |      |       |      |  |  |  |
| Rat snake   |  | PYLSVMQTFSMMLGDVNYRDAFLEPMLADKLPFPFLSFIIILIIIFSMIPILLMNLIGLA  |      |        |      |       |      |  |  |  |
| Python      |  | PYLSVMQTFSMMLGDVNYRDAFLEPMTFKLPFPFLSFIIILIIIFSLIPILLMNLIGLA   |      |        |      |       |      |  |  |  |
| Boa         |  | PYLSVMQTFSMMLGDVNYRDAFLEPMLHNRLPRPFLSFIIILIVFSLIPILLMNLIGLA   |      |        |      |       |      |  |  |  |
|             |  | 970                                                           | 980  | 990    | 1000 | 1010  | 1020 |  |  |  |
| ancestor    |  | VGDIAEVQKFAAMKRIAMQVNLHTNLEKKLPYWFLSRVDQESITVYPNRP            |      |        |      |       |      |  |  |  |
| Rattlesnake |  | VGDIAEVQKFAAMKRIAMQINLHTNLEKKLPYWFLNRVDQOSMVIYPNRSRFGVMSMFQ   |      |        |      |       |      |  |  |  |
| Rat snake   |  | VGDIAEVQKFAAMKRIAMQVNLHTNLEKKLPYWFLSRVDQESIVVYPNKPRYCGFMTVVFQ |      |        |      |       |      |  |  |  |
| Python      |  | VGDIAQVQKFAAMKRIAMQVNLHTNLEKKLPYWFLSRVDQESIILYPNRPYCGFMSVFH   |      |        |      |       |      |  |  |  |
| Boa         |  | VGDIAQVQKFAAMKRIAMQVSLHTNLEKKLPYWFLTRVDQETTLTLYPNKPRYCGFMSVLN |      |        |      |       |      |  |  |  |
|             |  | 1030                                                          | 1040 | 1050   | 1060 | 1070  | 1080 |  |  |  |
| Rattlesnake |  | YCFGWDNIASDAKNADAAIELELLKQKYRLKDTANLVEKQHDLLKQIAKKMEVISVVEDE  |      |        |      |       |      |  |  |  |
| Rat snake   |  | YCFGWDNTAADTQADTTLELEVLKQKYRLKDIAALVEKQHNLKLVAKMEIMSEAEDE     |      |        |      |       |      |  |  |  |
| Python      |  | YCFGWDSIAADAQADTALELEVLKQKYRLKDVALLMEKQHDLLKLLTRKLEIISEVEDE   |      |        |      |       |      |  |  |  |
| Boa         |  | YCFGWDSIAADTQNADTTLELEILKLYRLKDMATVIEKQHDLLKLVARKLEIISELEDE   |      |        |      |       |      |  |  |  |
|             |  | 1090                                                          | 1100 | 1110   |      |       |      |  |  |  |
| Rattlesnake |  | DLNDSLQSQFRKEHFENTNNKWDTVFKAVKS                               |      |        |      |       |      |  |  |  |
| Rat snake   |  | DPNDLFQNKFRKEQLEHKNSKWDTVLKAVKSKCA                            |      |        |      |       |      |  |  |  |
| Python      |  | DAADTFQQEFRKERSERINNKWDTVLKVEKSE                              |      |        |      |       |      |  |  |  |
| Boa         |  | DLSDSLQANFRREQSDRNNSKWDTVLKVVKTK                              |      |        |      |       |      |  |  |  |

Supplementary Figure 1 (continued)

|             |   |   |   |   |   |   |   |   |   |   |   |   |   |   |   | 1 | 1 | 1 | 1 |
|-------------|---|---|---|---|---|---|---|---|---|---|---|---|---|---|---|---|---|---|---|
|             |   | 1 | 1 | 1 | 2 | 3 | 3 | 3 | 4 | 7 | 8 | 8 | 9 | 9 | 9 | 0 | 0 | 0 | 0 |
|             | 4 | 7 | 8 | 9 | 2 | 3 | 4 | 9 | 3 | 4 | 2 | 2 | 1 | 1 | 4 | 1 | 2 | 6 | 7 |
|             | 9 | 9 | 4 | 8 | 8 | 0 | 2 | 1 | 4 | 6 | 8 | 9 | 3 | 6 | 6 | 7 | 8 | 2 | 4 |
| zebrafish a | Q | L | H | C | E | L | D | Q | S | N | S | S | V | M | L | F | R | N | S |
| zebrafish b | S | L | C | C | E | L | D | Q | S | N | A | T | V | L | L | V | R | N | T |
| frog        | C | Q | H | C | E | L | D | Q | S | N | S | G | L | I | L | N | V | D | V |
| rattlesnake | S | L | P | C | E | M | D | H | T | S | V | H | L | V | L | S | I | D | I |
| rat snake   | C | V | S | A | V | L | N | Q | S | H | I | R | I | N | M | T | T | N | M |
| python      | S | L | P | C | E | M | D | H | T | S | V | H | L | V | L | S | I | D | I |
| Boa         | S | L | P | C | E | M | D | H | T | S | V | H | L | V | L | S | I | D | I |
| chicken     | C | V | P | C | E | L | D | Q | S | H | A | H | L | I | L |   |   |   |   |
| zebra finch | C | V | P | C | E | L | D | Q | S | H | A | H | L | I | L | S | S | D | V |
| mouse       | M | S | S | C | E | L | N | Q | S | K | A | Y | L | I | M | R | T | E | I |
| rat         | M | S | S | C | E | L | N | Q | S | K | A | Y | L | I | M | R | T | E | I |
| macaque     | S | I | S | C | E | L | N | Q | S | N | A | H | L | I | I | H | I | E | I |
| human       | S | I | S | C | E | L | N | Q | S | N | A | H | L | I | I | H | I | E | I |
| cow         | K | I | S | C | E | L | D | Q | S | S | A | Y | L | I | M | G | T | E | I |
| Pig         | A | I | S | C | E | L | D | Q | S | S | A | Y | L | I | M | G | T | D | I |
| Horse       | T | I | S | C | E | L | N | Q | S | N | A | H | L | I | M | R | A | E | I |
| dog         | A | I | S | C | E | L | N | Q | S | S | A | Y | L | I | M | R | A | E | I |
| opposum     | K | L | S | C | E | L | D | Q | S | N | N | D | L | I | L | N | T | E | I |
| mosquito    | E | L | E | R | E | I | N | N | S | Q | F | S | L | M | I | N | D | Q | K |
| fruit fly   | D | L | E | R | E | I | N | N | S | L | N | T | L | L | I | N | D | H | K |

**Supplementary Figure 2:** Amino acids at the 19 critical residues that are common to the three infrared-sensitive snake TRPA1 receptors. The numerical column headings specify the amino acid positions of the rattlesnake receptor. The blank residues of the chicken receptor indicate missing amino acids.
